# Supplementary material for: Celiac Disease Defined by Over-Sensitivity to Gliadin Activation and Superior Antigen Presentation of Dendritic Cells
Source: MDPI journal article supplement (doi:10.3390/ijms22189982), 2021-09-15
Supplement: s1 [file s1]

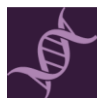

Article

# Celiac Disease Defined by Over-Sensitivity to Gliadin Activation and Superior Antigen Presentation of Dendritic Cells

Michael Hudec <sup>1,\*</sup>, Kamila Riegerová <sup>2</sup>, Jan Pala <sup>3,4</sup>, Viera Kútňá <sup>4</sup>, Marie Černá <sup>1</sup> and Valerie Bríd O'Leary <sup>1</sup>

<sup>1</sup> Department of Medical Genetics, Third Faculty of Medicine, Charles University, Ruská 87, 100 00 Prague, Czech Republic; marie.cerna@lf3.cuni.cz (M.Č.); valerie.oleary@lf3.cuni.cz (V.B.O.)

<sup>2</sup> Department of Immunology and Clinical Biochemistry, Third Faculty of Medicine, Charles University, Ruská 87, 100 00 Prague, Czech Republic; kamila.riegerova@lf3.cuni.cz

<sup>3</sup> Department of Pathophysiology, Third Faculty of Medicine, Charles University, Ruská 87, 10000 Prague, Czech Republic; jan.pala@lf3.cuni.cz

<sup>4</sup> Department of Experimental Neurobiology, National Institute of Mental Health, Topolova 748, 25067 Klecany, Czech Republic; viera.kutna@nudz.cz

\* Correspondence: Michael.hudec@lf3.cuni.cz

## Supplementary materials

**Table S1.** Genetic and non-genetic risk factors associated with celiacdisease [1-3].

| Genetic Factors Associated with Celiac Disease                     |
|--------------------------------------------------------------------|
| Class II HLA alleles DQ2/8                                         |
| Genetic disorders, Down and Turner's syndrome                      |
| Non-Genetic Factors Associated with Celiac Disease                 |
| First-degree relatives                                             |
| Duration of gluten exposure                                        |
| Age at gluten introduction                                         |
| Duration of breast-feeding                                         |
| Autoimmune disorders (Type 1 diabetes, Thyroid disease, hepatitis) |
| Anemia                                                             |
| Osteopenia disease                                                 |
| Skin disorders (Dermatitis herpetiformis)                          |
| Neurological disorders (Ataxia, Seizures, Myasthenia gravis)       |

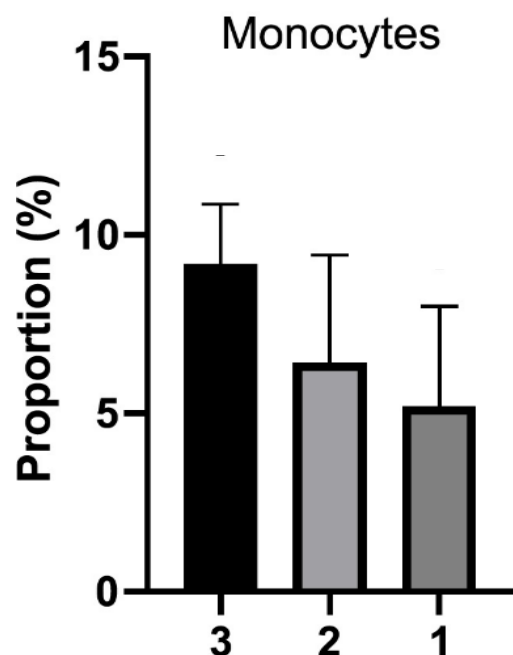

**Figure S1.** Supporting Figure 1. No statistically significant difference was found in the proportion of monocytes isolated from members of various familial generations (1-grandparents, 2-parents and 3-children).

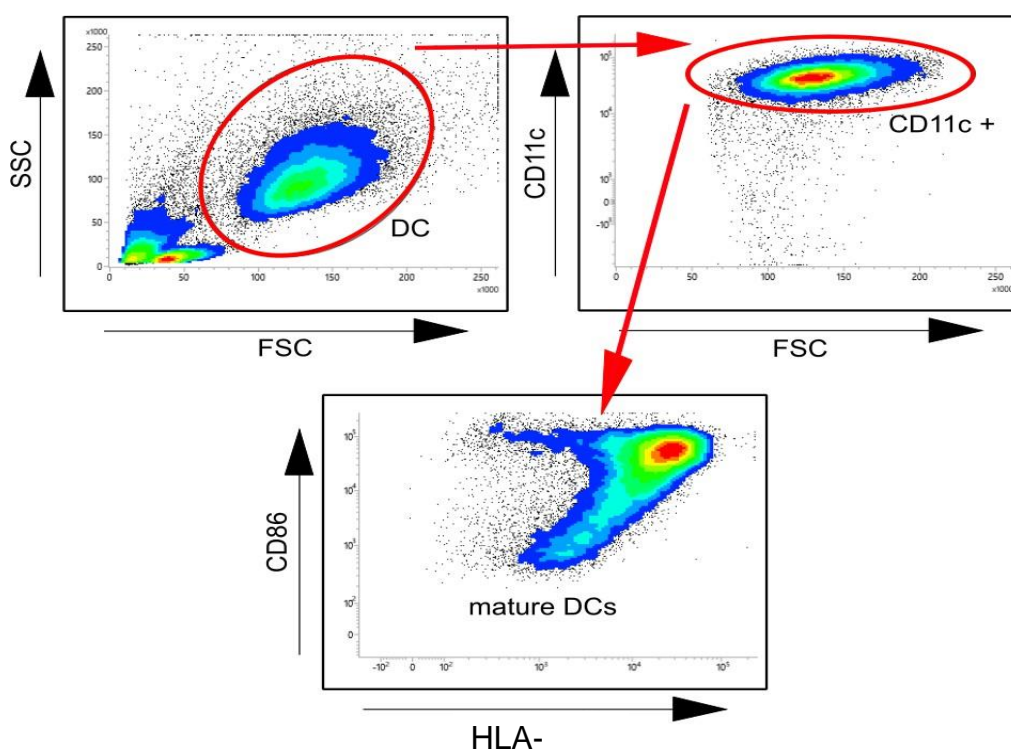

**Figure S2.** Supporting Figure 2. Representative example of the gating strategy for MoDC determination. MoDCs were determined by SSC/ FSC dot plot (upper left panel). The MoDC population was subsequently selected for the expression of lineage marker CD11c (upper right panel). The LPS/PTG activated MoDC population was controlled by the expression of maturation marker CD86 and antigen-presenting molecule HLA-DQ (lower panel).

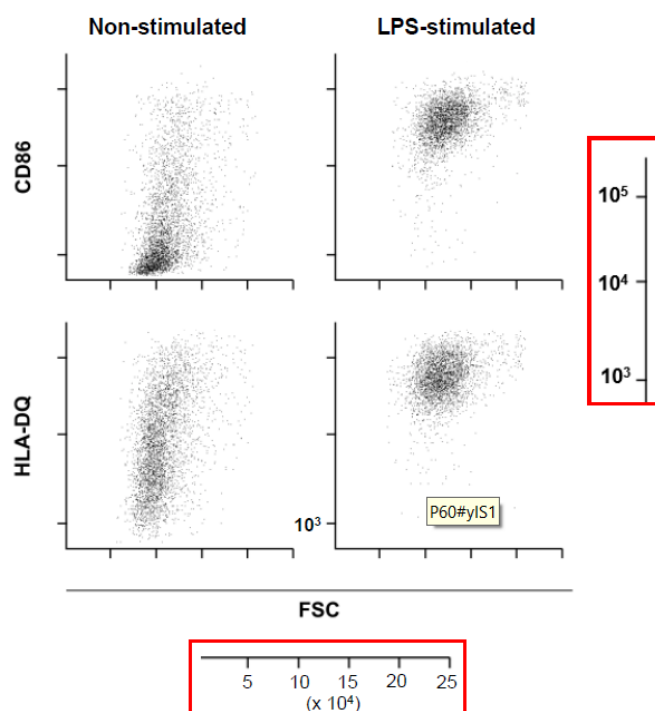

**Figure S3.** Supporting Figure 2 and 3. Representative forward scatter (FSC) dot plots of non-stimulated and LPS stimulated monocyte derived dendritic cells (MoDC) of healthy controls after 6 days cultivation, differentially expressing surface markers CD86 or HLA-DQ. Logarithmic scale provided (right).

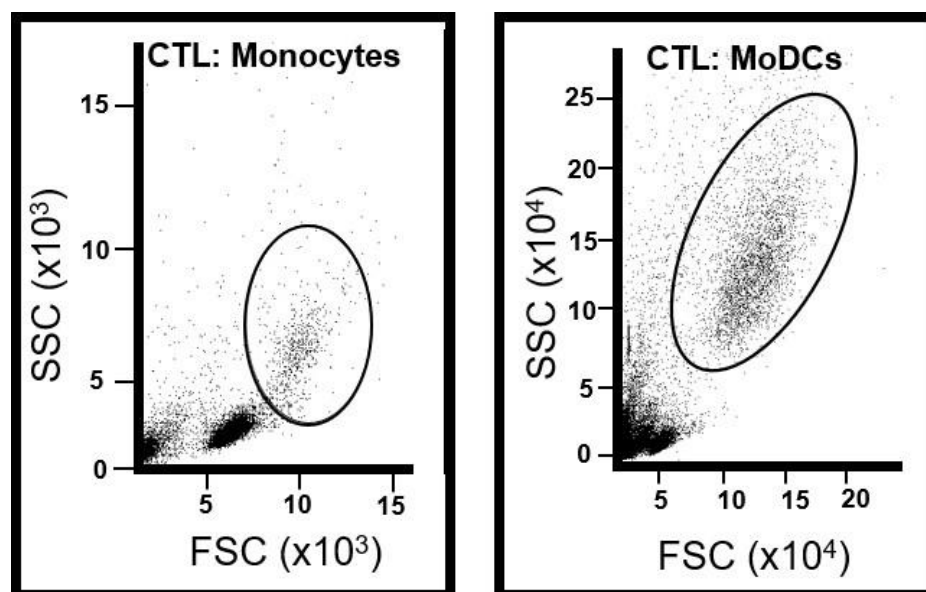

**Figure S4.** Supporting Figure 2. Dot plots indicating side scatter (SSC) versus forward scatter (FSC) profiles for monocytes (left) and stimulated monocyte derived dendritic cells (MoDCs; right) originating from healthy controls. Gating demarcates the percentage recovery of monocytes from peripheral mononuclear cells (left) or transformation efficiency to MoDCs post 24 hr exposure to LPS/PTG (right).

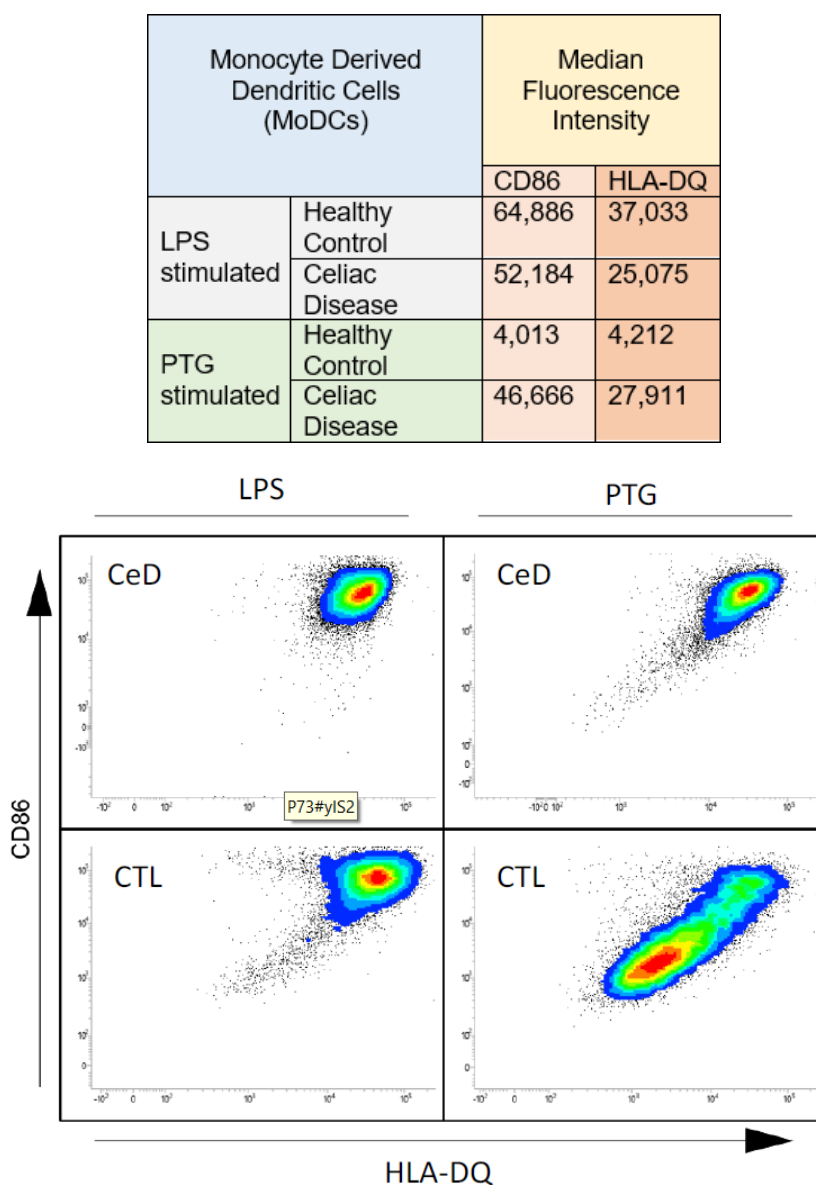

**Figure S5.** (Supporting Figure 3). Comparison of the flow cytometry data obtained following LPS or peptic-tryptic gliadin (PTG) fragment stimulation of MoDCs. MoDCs of CTLs stained by HLA-DQ (APC), CD86 (PE) show lower expression of selected markers after PTG stimulation. In contrast, MoDCs of CeD patients show similar reaction to LPS stimulation (Upper table provides exact MFI numbers obtained). Y axis represents CD86 expression, X axis represents HLA-DQ expression. Lines represent donors of stimulated MoDCs (CD-upper, HC-lower) and columns represent stimulation factor (LPS-left, PTG-right).

## References

1. Gujral, N.; Freeman H.J.; Thomson A.B., Celiac disease: prevalence, diagnosis, pathogenesis and treatment. *World J. Gastroenterol.* **2012**, *18*, 6036–59.
2. Ivarsson, A.; Hernell, O.; Stenlund, H.; Persson, L. Åke Breast-feeding protects against celiac disease. *Am. J. Clin. Nutr.* **2002**, *75*, 914–921, doi:10.1093/ajcn/75.5.914.
3. Goldsobel, A. Spector S. Allergy and immunology. *West J Med.* **1997**, *167*, 343.
